# Supplementary material for: Prediction of Complex Human Traits Using the Genomic Best Linear Unbiased Predictor
Source: PubMed Central journal article supplement (PMC3708840; doi:10.1371/journal.pgen.1003608), 2013-07-11
Supplement: pgen.1003608.s001.pdf [file pgen.1003608.s001.pdf]

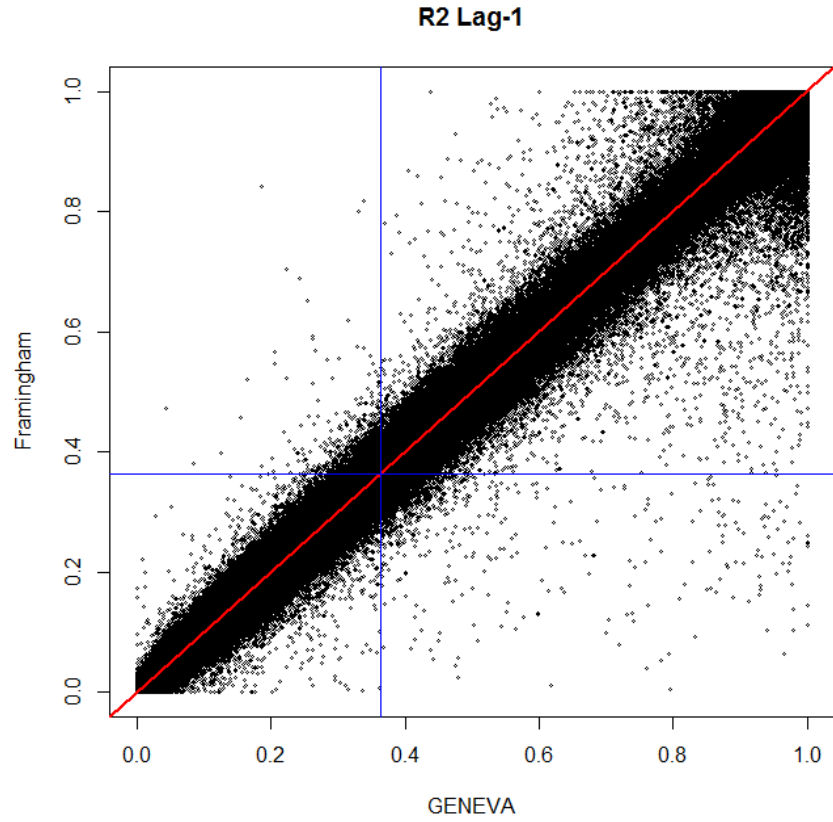

**Figure S1.** Squared-correlation between genotypes at adjacent markers observed in the FHS (vertical axis) and GEN datasets. The average inter-marker distance in the platform was 7.2kb The blue lines gives the median squared-correlation in both datasets.
