# Supplementary material for: Prediction of Complex Human Traits Using the Genomic Best Linear Unbiased Predictor
Source: PubMed Central journal article supplement (PMC3708840; doi:10.1371/journal.pgen.1003608), 2013-07-11
Supplement: pgen.1003608.s003.pdf [file pgen.1003608.s003.pdf]

**Table S1.** Estimates of genomic heritability,  $h_G^2$ , by data set, simulation scenario, genetic information used and Monte Carlo replicate.

| Dataset        | FRAMINGHAM |         |          |         |         |          | GENEVA |         |         |         |
|----------------|------------|---------|----------|---------|---------|----------|--------|---------|---------|---------|
| Scenario       | RAND       |         |          | LOW-MAF |         |          | RAND   |         | LOW-MAF |         |
| Information    | QTL        | Markers | Pedigree | QTL     | Markers | Pedigree | QTL    | Markers | QTL     | Markers |
| Rep-1          | .757       | .781    | .767     | .766    | .762    | .769     | .755   | .706    | .768    | .552    |
| Rep-2          | .775       | .751    | .742     | .779    | .713    | .714     | .774   | .668    | .777    | .562    |
| Rep-3          | .781       | .790    | .796     | .785    | .788    | .798     | .778   | .800    | .783    | .620    |
| Rep-4          | .780       | .779    | .774     | .770    | .736    | .765     | .770   | .751    | .784    | .636    |
| Rep-5          | .779       | .761    | .751     | .780    | .741    | .737     | .775   | .724    | .784    | .703    |
| Rep-6          | .766       | .764    | .750     | .772    | .776    | .787     | .756   | .727    | .757    | .656    |
| Rep-7          | .776       | .806    | .805     | .789    | .761    | .775     | .776   | .677    | .775    | .585    |
| Rep-8          | .785       | .772    | .764     | .778    | .747    | .761     | .772   | .679    | .777    | .582    |
| Rep-9          | .769       | .786    | .769     | .774    | .760    | .769     | .755   | .780    | .774    | .552    |
| Rep-10         | .768       | .735    | .725     | .782    | .744    | .729     | .752   | .748    | .775    | .595    |
| Rep-11         | .775       | .789    | .770     | .765    | .723    | .729     | .765   | .733    | .769    | .461    |
| Rep-12         | .767       | .760    | .726     | .772    | .755    | .760     | .785   | .775    | .777    | .602    |
| Rep-13         | .779       | .784    | .760     | .792    | .773    | .800     | .795   | .733    | .770    | .532    |
| Rep-14         | .805       | .800    | .782     | .793    | .723    | .718     | .787   | .721    | .778    | .571    |
| Rep-15         | .781       | .749    | .761     | .779    | .759    | .766     | .767   | .774    | .779    | .551    |
| Rep-16         | .774       | .786    | .774     | .768    | .753    | .755     | .784   | .750    | .786    | .533    |
| Rep-17         | .778       | .757    | .737     | .781    | .710    | .724     | .778   | .713    | .768    | .575    |
| Rep-18         | .788       | .778    | .759     | .773    | .754    | .776     | .778   | .795    | .772    | .458    |
| Rep-19         | .776       | .796    | .787     | .769    | .735    | .747     | .767   | .675    | .769    | .567    |
| Rep-20         | .776       | .776    | .772     | .787    | .754    | .768     | .766   | .722    | .784    | .617    |
| Rep-21         | .771       | .775    | .772     | .779    | .750    | .736     | .772   | .788    | .756    | .504    |
| Rep-22         | .757       | .753    | .762     | .780    | .734    | .726     | .779   | .787    | .769    | .496    |
| Rep-23         | .771       | .767    | .754     | .775    | .757    | .760     | .772   | .687    | .797    | .517    |
| Rep-24         | .772       | .781    | .762     | .777    | .742    | .769     | .769   | .726    | .777    | .544    |
| Rep-25         | .777       | .795    | .784     | .782    | .768    | .783     | .786   | .806    | .779    | .540    |
| Rep-26         | .762       | .740    | .721     | .771    | .747    | .743     | .772   | .693    | .765    | .646    |
| Rep-27         | .781       | .784    | .766     | .782    | .758    | .770     | .768   | .749    | .775    | .590    |
| Rep-28         | .775       | .789    | .791     | .777    | .736    | .729     | .763   | .709    | .782    | .652    |
| Rep-29         | .772       | .768    | .759     | .777    | .741    | .751     | .780   | .752    | .777    | .649    |
| Rep-30         | .769       | .768    | .770     | .773    | .738    | .740     | .779   | .772    | .778    | .554    |
| <b>Average</b> | .775       | .774    | .764     | .777    | .748    | .755     | .773   | .737    | .775    | .573    |
| <b>SD</b>      | .009       | .018    | .020     | .007    | .018    | .023     | .010   | .040    | .008    | .058    |
