# Supplementary material for: Prediction of Complex Human Traits Using the Genomic Best Linear Unbiased Predictor
Source: PubMed Central journal article supplement (PMC3708840; doi:10.1371/journal.pgen.1003608), 2013-07-11
Supplement: pgen.1003608.s004.pdf [file pgen.1003608.s004.pdf]

**Table S2.** R-squared ( $R^2$ ) between realized and predicted phenotype in training data sets, by data set, simulation scenario, genetic information used and Monte Carlo replicate.

| Dataset        | FRAMINGHAM |         |          |         |         |          | GENEVA |         |         |         |
|----------------|------------|---------|----------|---------|---------|----------|--------|---------|---------|---------|
| Scenario       | RAND       |         |          | LOW-MAF |         |          | RAND   |         | LOW-MAF |         |
| Information    | QTL        | Markers | Pedigree | QTL     | Markers | Pedigree | QTL    | Markers | QTL     | Markers |
| Rep-1          | .905       | .964    | .965     | .908    | .958    | .966     | .922   | .989    | .925    | .976    |
| Rep-2          | .914       | .955    | .958     | .914    | .942    | .950     | .931   | .986    | .928    | .973    |
| Rep-3          | .916       | .967    | .973     | .920    | .966    | .974     | .933   | .995    | .933    | .982    |
| Rep-4          | .919       | .964    | .968     | .910    | .950    | .966     | .929   | .992    | .932    | .985    |
| Rep-5          | .917       | .959    | .962     | .916    | .952    | .957     | .933   | .990    | .933    | .989    |
| Rep-6          | .909       | .959    | .961     | .913    | .963    | .971     | .923   | .990    | .919    | .985    |
| Rep-7          | .918       | .971    | .975     | .921    | .958    | .968     | .931   | .988    | .929    | .979    |
| Rep-8          | .919       | .962    | .965     | .914    | .953    | .964     | .930   | .987    | .929    | .977    |
| Rep-9          | .914       | .965    | .966     | .912    | .958    | .966     | .922   | .994    | .927    | .974    |
| Rep-10         | .910       | .949    | .953     | .916    | .952    | .954     | .921   | .992    | .928    | .981    |
| Rep-11         | .915       | .967    | .966     | .907    | .945    | .955     | .927   | .991    | .925    | .963    |
| Rep-12         | .908       | .958    | .954     | .911    | .956    | .963     | .937   | .994    | .930    | .978    |
| Rep-13         | .917       | .966    | .964     | .923    | .962    | .974     | .941   | .991    | .926    | .970    |
| Rep-14         | .932       | .970    | .970     | .921    | .945    | .951     | .937   | .990    | .930    | .978    |
| Rep-15         | .918       | .954    | .964     | .915    | .957    | .965     | .929   | .994    | .929    | .974    |
| Rep-16         | .916       | .965    | .967     | .909    | .955    | .962     | .936   | .992    | .933    | .974    |
| Rep-17         | .916       | .956    | .956     | .915    | .940    | .952     | .934   | .990    | .924    | .980    |
| Rep-18         | .923       | .963    | .963     | .913    | .955    | .968     | .933   | .995    | .926    | .963    |
| Rep-19         | .915       | .969    | .971     | .908    | .949    | .960     | .928   | .986    | .925    | .975    |
| Rep-20         | .917       | .962    | .967     | .919    | .956    | .966     | .928   | .990    | .933    | .980    |
| Rep-21         | .912       | .962    | .967     | .915    | .955    | .957     | .931   | .994    | .920    | .963    |
| Rep-22         | .906       | .955    | .964     | .914    | .950    | .954     | .935   | .993    | .924    | .966    |
| Rep-23         | .912       | .960    | .961     | .912    | .957    | .963     | .931   | .987    | .939    | .970    |
| Rep-24         | .910       | .964    | .965     | .914    | .952    | .966     | .929   | .990    | .930    | .959    |
| Rep-25         | .915       | .968    | .970     | .917    | .960    | .970     | .936   | .995    | .931    | .973    |
| Rep-26         | .907       | .951    | .952     | .911    | .954    | .958     | .930   | .989    | .924    | .986    |
| Rep-27         | .919       | .965    | .965     | .918    | .957    | .966     | .929   | .992    | .928    | .980    |
| Rep-28         | .917       | .966    | .972     | .914    | .950    | .954     | .927   | .988    | .932    | .984    |
| Rep-29         | .913       | .960    | .963     | .914    | .951    | .961     | .935   | .992    | .931    | .981    |
| Rep-30         | .911       | .960    | .966     | .911    | .950    | .957     | .934   | .993    | .930    | .976    |
| <b>Average</b> | .915       | .962    | .964     | .914    | .954    | .962     | .931   | .991    | .928    | .976    |
| <b>SE</b>      | .005       | .006    | .006     | .004    | .006    | .007     | .005   | .003    | .004    | .008    |
