# Supplementary material for: Prediction of Complex Human Traits Using the Genomic Best Linear Unbiased Predictor
Source: PubMed Central journal article supplement (PMC3708840; doi:10.1371/journal.pgen.1003608), 2013-07-11
Supplement: pgen.1003608.s006.pdf [file pgen.1003608.s006.pdf]

**Table S4.** R-squared ( $R^2$ ) between realized and predicted genetic value in training data sets, by data set, simulation scenario, genetic information used and Monte Carlo replicate.

| Dataset        | FRAMINGHAM |         |          |         |         |          | GENEVA |         |         |         |
|----------------|------------|---------|----------|---------|---------|----------|--------|---------|---------|---------|
| Scenario       | RAND       |         |          | LOW-MAF |         |          | RAND   |         | LOW-MAF |         |
| Information    | QTL        | Markers | Pedigree | QTL     | Markers | Pedigree | QTL    | Markers | QTL     | Markers |
| Rep-1          | .871       | .827    | .824     | .870    | .820    | .818     | .848   | .793    | .856    | .791    |
| Rep-2          | .868       | .824    | .817     | .869    | .818    | .814     | .848   | .794    | .855    | .788    |
| Rep-3          | .861       | .817    | .813     | .879    | .833    | .830     | .846   | .798    | .859    | .802    |
| Rep-4          | .866       | .823    | .819     | .870    | .818    | .820     | .856   | .804    | .856    | .799    |
| Rep-5          | .873       | .827    | .822     | .876    | .830    | .827     | .862   | .811    | .858    | .807    |
| Rep-6          | .856       | .810    | .805     | .869    | .823    | .820     | .843   | .787    | .842    | .782    |
| Rep-7          | .878       | .834    | .830     | .876    | .827    | .827     | .854   | .800    | .860    | .797    |
| Rep-8          | .865       | .823    | .818     | .873    | .825    | .824     | .855   | .800    | .864    | .804    |
| Rep-9          | .876       | .831    | .827     | .864    | .815    | .813     | .845   | .793    | .848    | .783    |
| Rep-10         | .865       | .822    | .816     | .869    | .822    | .818     | .850   | .794    | .853    | .792    |
| Rep-11         | .869       | .828    | .823     | .861    | .810    | .809     | .852   | .799    | .851    | .781    |
| Rep-12         | .862       | .818    | .812     | .869    | .823    | .822     | .853   | .802    | .859    | .798    |
| Rep-13         | .862       | .819    | .814     | .868    | .824    | .823     | .861   | .812    | .858    | .792    |
| Rep-14         | .879       | .841    | .837     | .870    | .820    | .819     | .862   | .813    | .874    | .808    |
| Rep-15         | .864       | .822    | .819     | .869    | .822    | .820     | .858   | .807    | .854    | .790    |
| Rep-16         | .872       | .831    | .827     | .867    | .820    | .817     | .861   | .812    | .863    | .801    |
| Rep-17         | .871       | .829    | .822     | .866    | .814    | .812     | .858   | .810    | .857    | .796    |
| Rep-18         | .879       | .837    | .832     | .874    | .829    | .828     | .854   | .806    | .854    | .786    |
| Rep-19         | .874       | .828    | .823     | .865    | .814    | .813     | .841   | .790    | .851    | .788    |
| Rep-20         | .873       | .832    | .828     | .869    | .823    | .823     | .855   | .803    | .863    | .806    |
| Rep-21         | .854       | .811    | .807     | .869    | .820    | .816     | .858   | .804    | .847    | .774    |
| Rep-22         | .859       | .817    | .812     | .867    | .818    | .814     | .856   | .808    | .852    | .783    |
| Rep-23         | .872       | .829    | .825     | .871    | .825    | .823     | .858   | .805    | .863    | .800    |
| Rep-24         | .857       | .812    | .806     | .864    | .813    | .813     | .846   | .794    | .855    | .786    |
| Rep-25         | .865       | .820    | .817     | .867    | .817    | .818     | .856   | .807    | .863    | .794    |
| Rep-26         | .866       | .822    | .817     | .873    | .825    | .822     | .861   | .808    | .859    | .801    |
| Rep-27         | .867       | .827    | .822     | .874    | .825    | .824     | .861   | .810    | .859    | .801    |
| Rep-28         | .871       | .828    | .823     | .871    | .820    | .818     | .850   | .801    | .863    | .803    |
| Rep-29         | .872       | .828    | .823     | .868    | .823    | .821     | .854   | .805    | .869    | .809    |
| Rep-30         | .862       | .820    | .814     | .860    | .807    | .806     | .854   | .806    | .855    | .792    |
| <b>Average</b> | .868       | .825    | .820     | .869    | .821    | .819     | .854   | .803    | .857    | .794    |
| <b>SE</b>      | .007       | .007    | .008     | .004    | .006    | .006     | .006   | .007    | .007    | .009    |
