# Supplementary material for: Prediction of Complex Human Traits Using the Genomic Best Linear Unbiased Predictor
Source: PubMed Central journal article supplement (PMC3708840; doi:10.1371/journal.pgen.1003608), 2013-07-11
Supplement: pgen.1003608.s007.pdf [file pgen.1003608.s007.pdf]

**Table S5.** R-Squared ( $R^2$ ) between realized and predicted genetic value in testing data sets, by data set, simulation scenario, genetic information used and Monte Carlo replicate.

| Dataset        | FRAMINGHAM |         |          |         |         |          | GENEVA |         |         |         |
|----------------|------------|---------|----------|---------|---------|----------|--------|---------|---------|---------|
| Scenario       | RAND       |         |          | LOW-MAF |         |          | RAND   |         | LOW-MAF |         |
| Information    | QTL        | Markers | Pedigree | QTL     | Markers | Pedigree | QTL    | Markers | QTL     | Markers |
| Rep-1          | .703       | .438    | .363     | .641    | .236    | .201     | .675   | .084    | .665    | .033    |
| Rep-2          | .665       | .332    | .307     | .694    | .265    | .244     | .617   | .040    | .681    | .053    |
| Rep-3          | .597       | .258    | .179     | .698    | .273    | .238     | .671   | .068    | .653    | .042    |
| Rep-4          | .652       | .314    | .273     | .692    | .354    | .333     | .672   | .114    | .651    | .056    |
| Rep-5          | .697       | .291    | .284     | .741    | .299    | .270     | .640   | .076    | .657    | .073    |
| Rep-6          | .701       | .381    | .313     | .694    | .287    | .258     | .665   | .136    | .640    | .091    |
| Rep-7          | .671       | .394    | .310     | .686    | .312    | .264     | .645   | .085    | .703    | .042    |
| Rep-8          | .721       | .428    | .378     | .713    | .303    | .245     | .644   | .051    | .680    | .038    |
| Rep-9          | .653       | .272    | .225     | .712    | .294    | .288     | .641   | .079    | .670    | .063    |
| Rep-10         | .634       | .228    | .142     | .674    | .317    | .315     | .611   | .035    | .680    | .037    |
| Rep-11         | .688       | .335    | .312     | .687    | .266    | .226     | .639   | .142    | .641    | .045    |
| Rep-12         | .675       | .372    | .324     | .691    | .306    | .288     | .626   | .128    | .703    | .061    |
| Rep-13         | .695       | .304    | .300     | .663    | .254    | .242     | .654   | .113    | .674    | .059    |
| Rep-14         | .693       | .330    | .239     | .666    | .241    | .185     | .615   | .069    | .688    | .036    |
| Rep-15         | .664       | .308    | .287     | .717    | .298    | .278     | .608   | .076    | .637    | .021    |
| Rep-16         | .691       | .434    | .378     | .677    | .259    | .248     | .685   | .092    | .721    | .059    |
| Rep-17         | .703       | .320    | .287     | .677    | .319    | .304     | .617   | .043    | .691    | .067    |
| Rep-18         | .650       | .310    | .256     | .669    | .286    | .271     | .624   | .056    | .680    | .065    |
| Rep-19         | .605       | .318    | .227     | .673    | .264    | .240     | .613   | .125    | .628    | .028    |
| Rep-20         | .725       | .394    | .351     | .691    | .322    | .300     | .613   | .079    | .670    | .061    |
| Rep-21         | .668       | .256    | .199     | .661    | .366    | .355     | .633   | .068    | .603    | .034    |
| Rep-22         | .661       | .270    | .200     | .665    | .312    | .301     | .669   | .078    | .661    | .105    |
| Rep-23         | .729       | .400    | .356     | .678    | .336    | .324     | .667   | .095    | .704    | .051    |
| Rep-24         | .713       | .326    | .276     | .660    | .265    | .264     | .683   | .110    | .640    | .111    |
| Rep-25         | .632       | .278    | .216     | .699    | .287    | .273     | .689   | .062    | .661    | .083    |
| Rep-26         | .687       | .304    | .235     | .685    | .374    | .335     | .604   | .105    | .688    | .041    |
| Rep-27         | .704       | .353    | .318     | .711    | .323    | .314     | .680   | .105    | .706    | .055    |
| Rep-28         | .723       | .337    | .270     | .707    | .295    | .252     | .629   | .079    | .674    | .097    |
| Rep-29         | .676       | .279    | .241     | .682    | .338    | .353     | .661   | .080    | .675    | .107    |
| Rep-30         | .699       | .275    | .248     | .725    | .308    | .286     | .621   | .076    | .677    | .054    |
| <b>Average</b> | .679       | .328    | .277     | .688    | .299    | .276     | .644   | .085    | .670    | .059    |
| <b>SE</b>      | .034       | .056    | .060     | .022    | .035    | .042     | .027   | .028    | .026    | .024    |
