# Supplementary material for: Prediction of Complex Human Traits Using the Genomic Best Linear Unbiased Predictor
Source: PLoS Genet. 2013 Jul 11;9(7):e1003608. doi: 10.1371/journal.pgen.1003608 (PMC3708840; doi:10.1371/journal.pgen.1003608)
Supplement: Table S3 — R-Squared (R2) between realized and predicted phenotype in testing datasets, by dataset, simulation scenario and genetic information used for analysis. (PDF) [file pgen.1003608.s005.pdf]

**Table S3.** R-Squared ( $R^2$ ) between realized and predicted phenotype in testing data sets, by data set, simulation scenario, genetic information used and Monte Carlo replicate.

| Dataset        | FRAMINGHAM |         |          |         |         |          | GENEVA |         |         |         |
|----------------|------------|---------|----------|---------|---------|----------|--------|---------|---------|---------|
| Scenario       | RAND       |         |          | LOW-MAF |         |          | RAND   |         | LOW-MAF |         |
| Information    | QTL        | Markers | Pedigree | QTL     | Markers | Pedigree | QTL    | Markers | QTL     | Markers |
| Rep-1          | .600       | .373    | .305     | .490    | .191    | .170     | .546   | .069    | .529    | .038    |
| Rep-2          | .524       | .270    | .236     | .561    | .226    | .191     | .538   | .029    | .535    | .039    |
| Rep-3          | .463       | .214    | .148     | .556    | .222    | .195     | .558   | .067    | .541    | .039    |
| Rep-4          | .501       | .234    | .207     | .542    | .254    | .252     | .539   | .073    | .522    | .034    |
| Rep-5          | .571       | .239    | .235     | .620    | .254    | .238     | .494   | .069    | .508    | .058    |
| Rep-6          | .586       | .316    | .258     | .544    | .245    | .217     | .517   | .097    | .503    | .070    |
| Rep-7          | .531       | .333    | .259     | .554    | .263    | .216     | .501   | .084    | .583    | .040    |
| Rep-8          | .586       | .332    | .305     | .531    | .216    | .191     | .528   | .042    | .542    | .036    |
| Rep-9          | .523       | .208    | .177     | .584    | .237    | .250     | .545   | .066    | .548    | .050    |
| Rep-10         | .486       | .165    | .103     | .528    | .241    | .242     | .475   | .031    | .552    | .050    |
| Rep-11         | .522       | .255    | .240     | .556    | .233    | .203     | .526   | .124    | .514    | .036    |
| Rep-12         | .525       | .278    | .246     | .560    | .236    | .213     | .502   | .105    | .547    | .065    |
| Rep-13         | .538       | .233    | .233     | .550    | .205    | .194     | .495   | .073    | .533    | .044    |
| Rep-14         | .592       | .295    | .207     | .536    | .176    | .133     | .513   | .074    | .521    | .036    |
| Rep-15         | .542       | .254    | .228     | .557    | .226    | .212     | .509   | .063    | .518    | .019    |
| Rep-16         | .571       | .340    | .291     | .537    | .218    | .214     | .556   | .069    | .585    | .042    |
| Rep-17         | .570       | .257    | .244     | .543    | .245    | .234     | .464   | .025    | .554    | .060    |
| Rep-18         | .495       | .264    | .232     | .535    | .243    | .221     | .521   | .050    | .531    | .044    |
| Rep-19         | .493       | .271    | .207     | .565    | .212    | .198     | .473   | .095    | .507    | .023    |
| Rep-20         | .629       | .344    | .299     | .538    | .280    | .262     | .460   | .058    | .522    | .059    |
| Rep-21         | .540       | .216    | .169     | .530    | .307    | .289     | .499   | .047    | .473    | .018    |
| Rep-22         | .516       | .192    | .146     | .527    | .243    | .249     | .566   | .075    | .563    | .084    |
| Rep-23         | .565       | .293    | .258     | .545    | .248    | .234     | .569   | .077    | .579    | .037    |
| Rep-24         | .532       | .232    | .206     | .506    | .212    | .213     | .535   | .101    | .500    | .091    |
| Rep-25         | .491       | .234    | .169     | .578    | .232    | .221     | .542   | .053    | .527    | .077    |
| Rep-26         | .558       | .247    | .200     | .575    | .306    | .264     | .468   | .086    | .540    | .032    |
| Rep-27         | .587       | .263    | .235     | .573    | .265    | .261     | .548   | .087    | .536    | .045    |
| Rep-28         | .595       | .280    | .229     | .600    | .249    | .226     | .502   | .069    | .544    | .062    |
| Rep-29         | .548       | .234    | .203     | .544    | .280    | .288     | .531   | .079    | .548    | .091    |
| Rep-30         | .561       | .238    | .218     | .562    | .243    | .221     | .494   | .081    | .571    | .049    |
| <b>Average</b> | .545       | .263    | .223     | .551    | .240    | .224     | .517   | .071    | .536    | .049    |
| <b>SE</b>      | .040       | .048    | .047     | .026    | .029    | .033     | .031   | .023    | .026    | .019    |
